# Supplementary material for: Platelet factor 4 limits neutrophil extracellular trap– and cell-free DNA–induced thrombogenicity and endothelial injury
Source: PubMed Central journal article supplement (PMC10721321; doi:10.1172/jci.insight.171054), 2023-11-22
Supplement: jciinsight-8-171054-s249.pdf [file jciinsight-8-171054-s249.pdf]

## SUPPLEMENTAL MATERIALS AND METHODS

### *Reagents*

All reagents were purchased from Sigma-Aldrich except as noted. Recombinant hPF4 was expressed in S2 cells and purified using affinity chromatography and protein liquid chromatography as previously described (1). The end-product was found to be endotoxin-free using ToxinSensor™ chromogenic LAL endotoxin assay kit (Genscript L00350), and was tested for size distribution by SDS-polyacrylamide gel electrophoresis. KKO is a mouse IgG<sub>2bκ</sub> anti-hPF4-heparin monoclonal antibody, purified from hybridoma supernatants (2). DNA 1 kb and 100 bp ladders were from New England BioLabs. GeneRuler high range DNA ladder (>50 kb; SM1351) was from ThermoFisher Scientific.

### *Human neutrophil isolation*

Human whole blood collected into 3.8% sodium citrate (1:10 v/v) was layered over an equal volume of Lympholyte®-Poly density gradient (CedarLane Labs CL5071) and centrifuged at 500 g for 35 minutes at RT. The neutrophil layer was collected and washed with Hank's Balanced Salt Solution (HBSS, Gibco) by centrifugation at 350 g for 10 minutes. The pellet was resuspended in 3 mL ACK lysis buffer (Quality Biological), followed by immediate addition of 7 mL HBSS to dilute the leukocyte suspension. After centrifugation at 350 g for 5 more minutes, the pellet was resuspended in HBSS containing CaCl<sub>2</sub> and MgCl<sub>2</sub> (Gibco).

### *Intravenous DNA administration into mice*

Wild-type (WT) C57BL/6 mice (Jackson Laboratory; strain #000664) or littermates deficient in murine PF4 (*CXCL4*<sup>-/-</sup>) mice were given a single bolus of HMW DNA (100 µg/mouse) via tail vein prior to blood collection from the retro-orbital sinus 30 minutes post-DNA infusion into 1 mM EDTA. Mice were euthanized 4 hours post-DNA infusion, and blood was collected from the inferior vena cava into EDTA. Platelet-poor plasma was isolated by centrifugation at 2000 g for 20 minutes at RT for study.

### *Cystatin C ELISA*

Clear-bottom MaxiSorp™ 96-well plate (442404, NUNC) was coated with cystatin C capture antibody (R&D Systems; DY1238) overnight at 4°C and blocked with 1% BSA for 1 hour at RT. Citrated plasma was diluted 1000-fold in 1% BSA, and incubated for 2 hours at RT in coated 96-well plate, followed by incubation with cystatin C detection antibody for 2 hours at RT. The

microplate was then incubated with streptavidin-peroxidase conjugate for 20 minutes at RT, and chromogenic substrate was then added for 2 minutes at RT. Reactions were stopped and absorbance was immediately measured at 450nm.

## SUPPLEMENTAL FIGURES

### **Figure S1. Size separation of HMW and LWM NETs and DNA.**

Representative images of DNA size separation. **(A)** 0.4% agarose gel size-separation of 10 µg HMW DNA and NETs with M = 50 kb size marker. **(B)** HMW NETs and DNA were digested with DNase I and size-separated on a 0.9% agarose gel with M (left) = 1 kb size marker and M (right) = 100 bp size marker. **(C)** Same as in (B) but following digestion with the indicated restriction enzymes. Af2 = AfIII, BsrGI-HF = BG1 and Al1 = AluI.

### **Figure S2. LMW DNA-induced fibrin generation in PNP in the presence of PF4 and KKO.**

**(A)** Lag time for LMW DNA-induced fibrin generation in the presence of increasing PF4 concentrations and 10 µg/mL KKO. **(B)** Lag time for LMW DNA-induced fibrin generation in the presence of low dose PF4 (1 µg/mL) and the indicated KKO concentrations. Data are mean ± SEM of 3 independent experiments.

### **Figure S3. LMW NETs- and DNA-induced thrombin generation in normal plasma, and fibrin formation in depleted plasma.**

**(A)** Representative kinetic curves of thrombin generation over time, initiated by LMW NETs (left) and DNA (right) in the absence or presence of PF4 and KKO. **(B)** Representative kinetic curves of fibrin generation in PNP or FXI- or FXII-depleted plasma in the absence or presence of LMW DNA with or without added PF4 (20 µg/mL).

### **Figure S4. Effects of PF4 in LMW DNA-induced fibrin generation in depleted (dep) plasma supplemented with FXI and FXII.**

**(A)** Lag time of LMW DNA-induced fibrin generation and effects of PF4 in FXI-dep plasma supplemented with indicated FXI concentrations. **(B)** Lag time of LMW DNA-induced fibrin generation and effects of PF4 in FXII-dep plasma supplemented with various FXII concentrations. Data are mean ± SEM of 3 independent experiments.

### **Figure S5. PF4 protects endothelial cells from LMW dsDNA and ssDNA-induced VWF release mediated by TLR9.**

**(A and B)** Representative images of HUVECs showing immunofluorescent staining for VWF (red) and nuclei (blue) upon exposure to LMW dsDNA **(A)** or ssDNA **(B)** fragments in the absence or presence of PF4. Mean fluorescence intensity (MFI) of released VWF from HUVECs exposed to

LMW dsDNA (**C**) or ssDNA (**D**), with or without the TLR9 inhibitor HCQ. Data were normalized to MFI of untreated cells without exposure to dsDNA or inhibitor (as indicated by dotted lines). Exposure to  $\alpha$ -thrombin (C) or TNF $\alpha$  (D) serves as a positive control. Data are mean  $\pm$  SEM of at least 3 independent experiments.

Figure S1

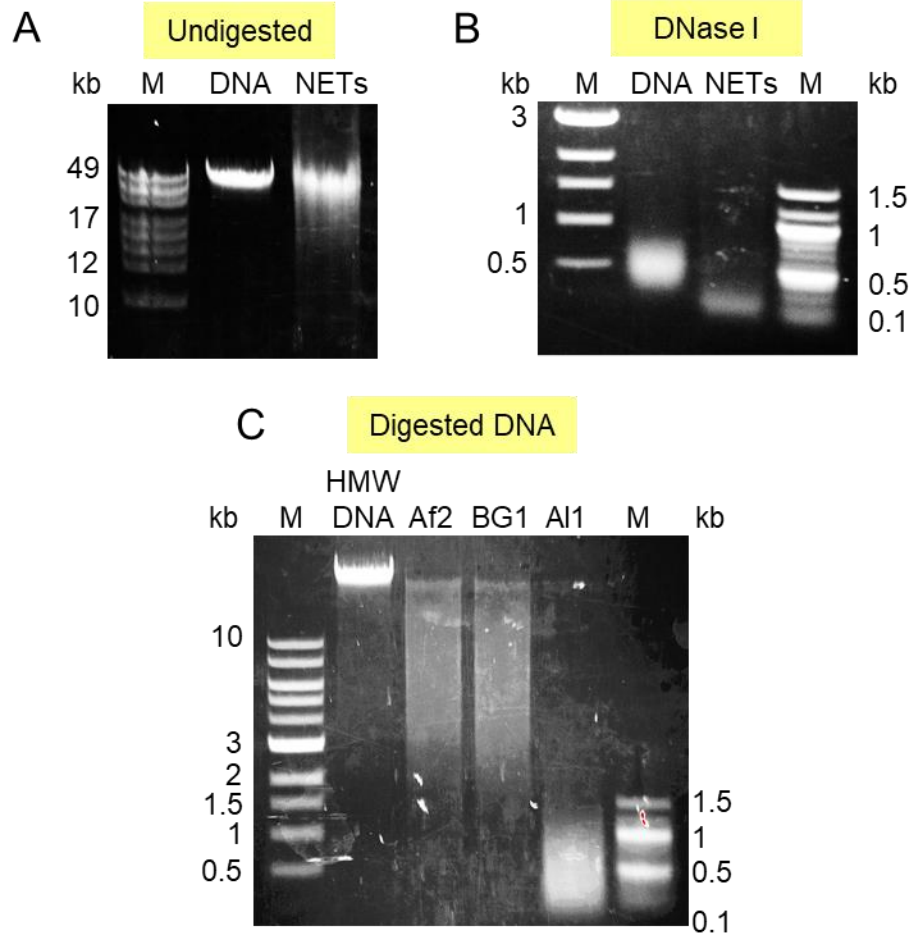

Figure S2

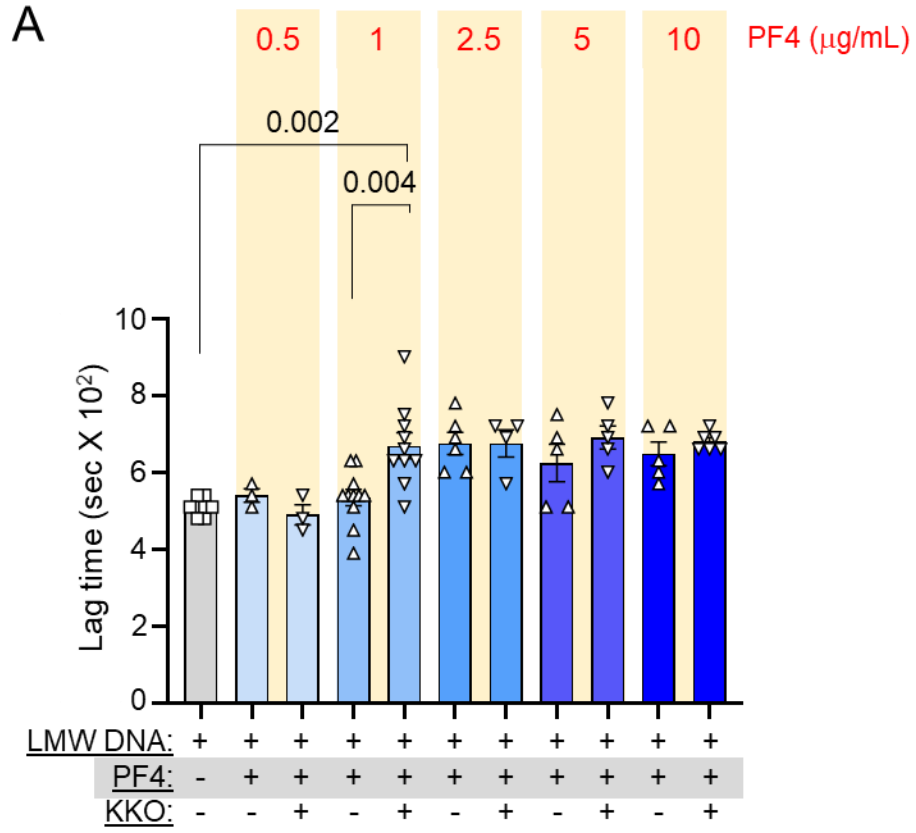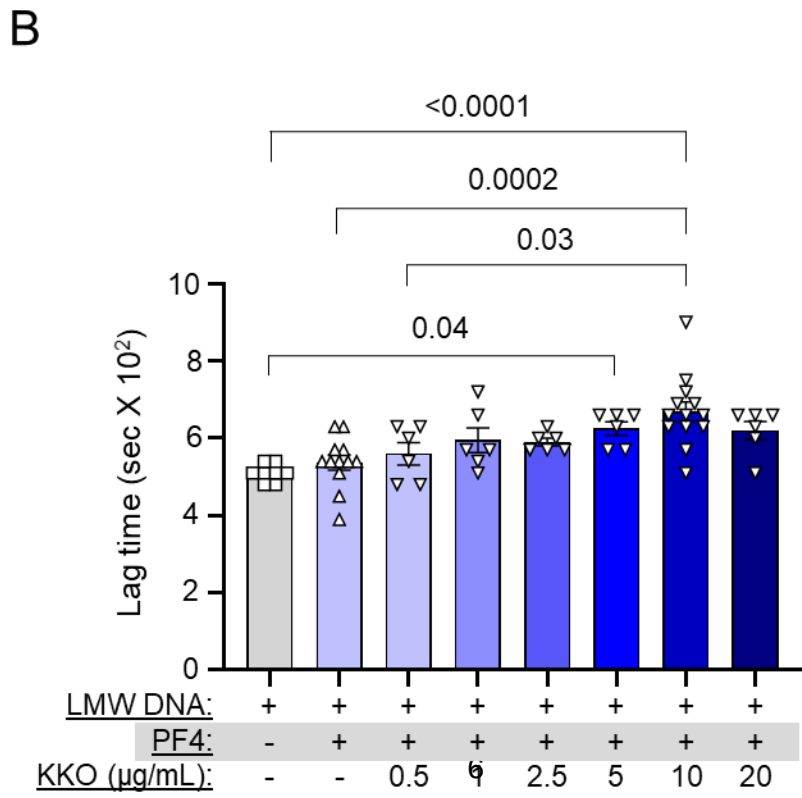

Figure S3

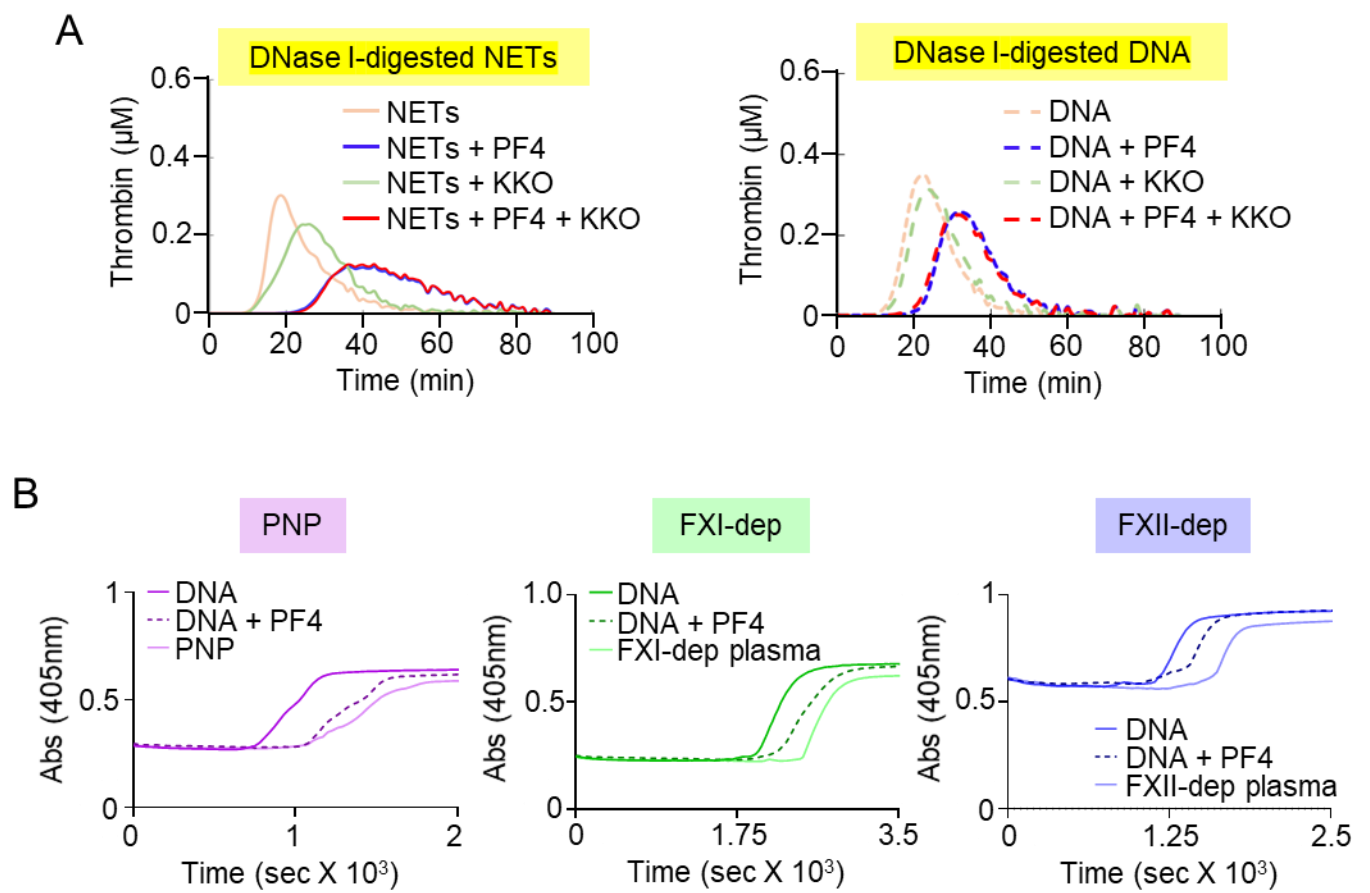

Figure S4

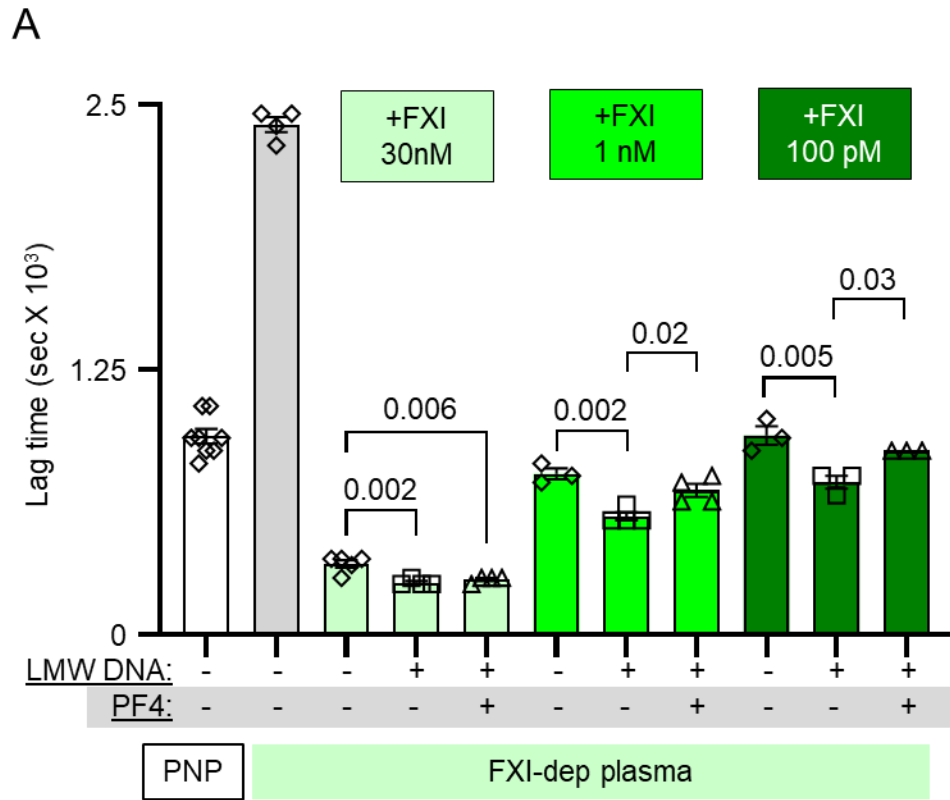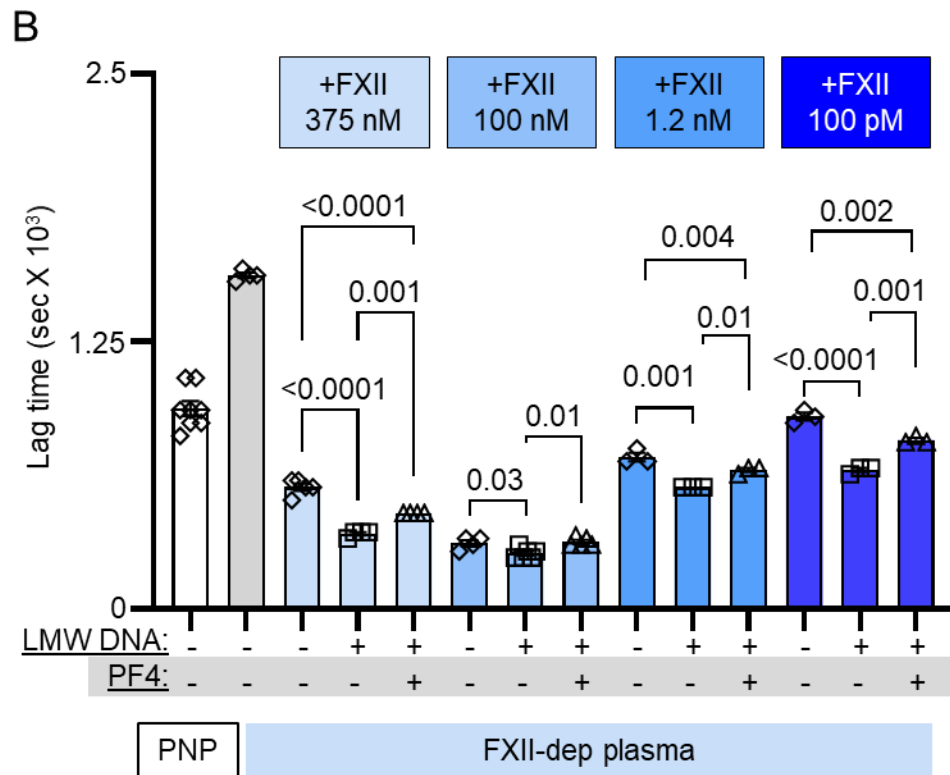



Figure S5

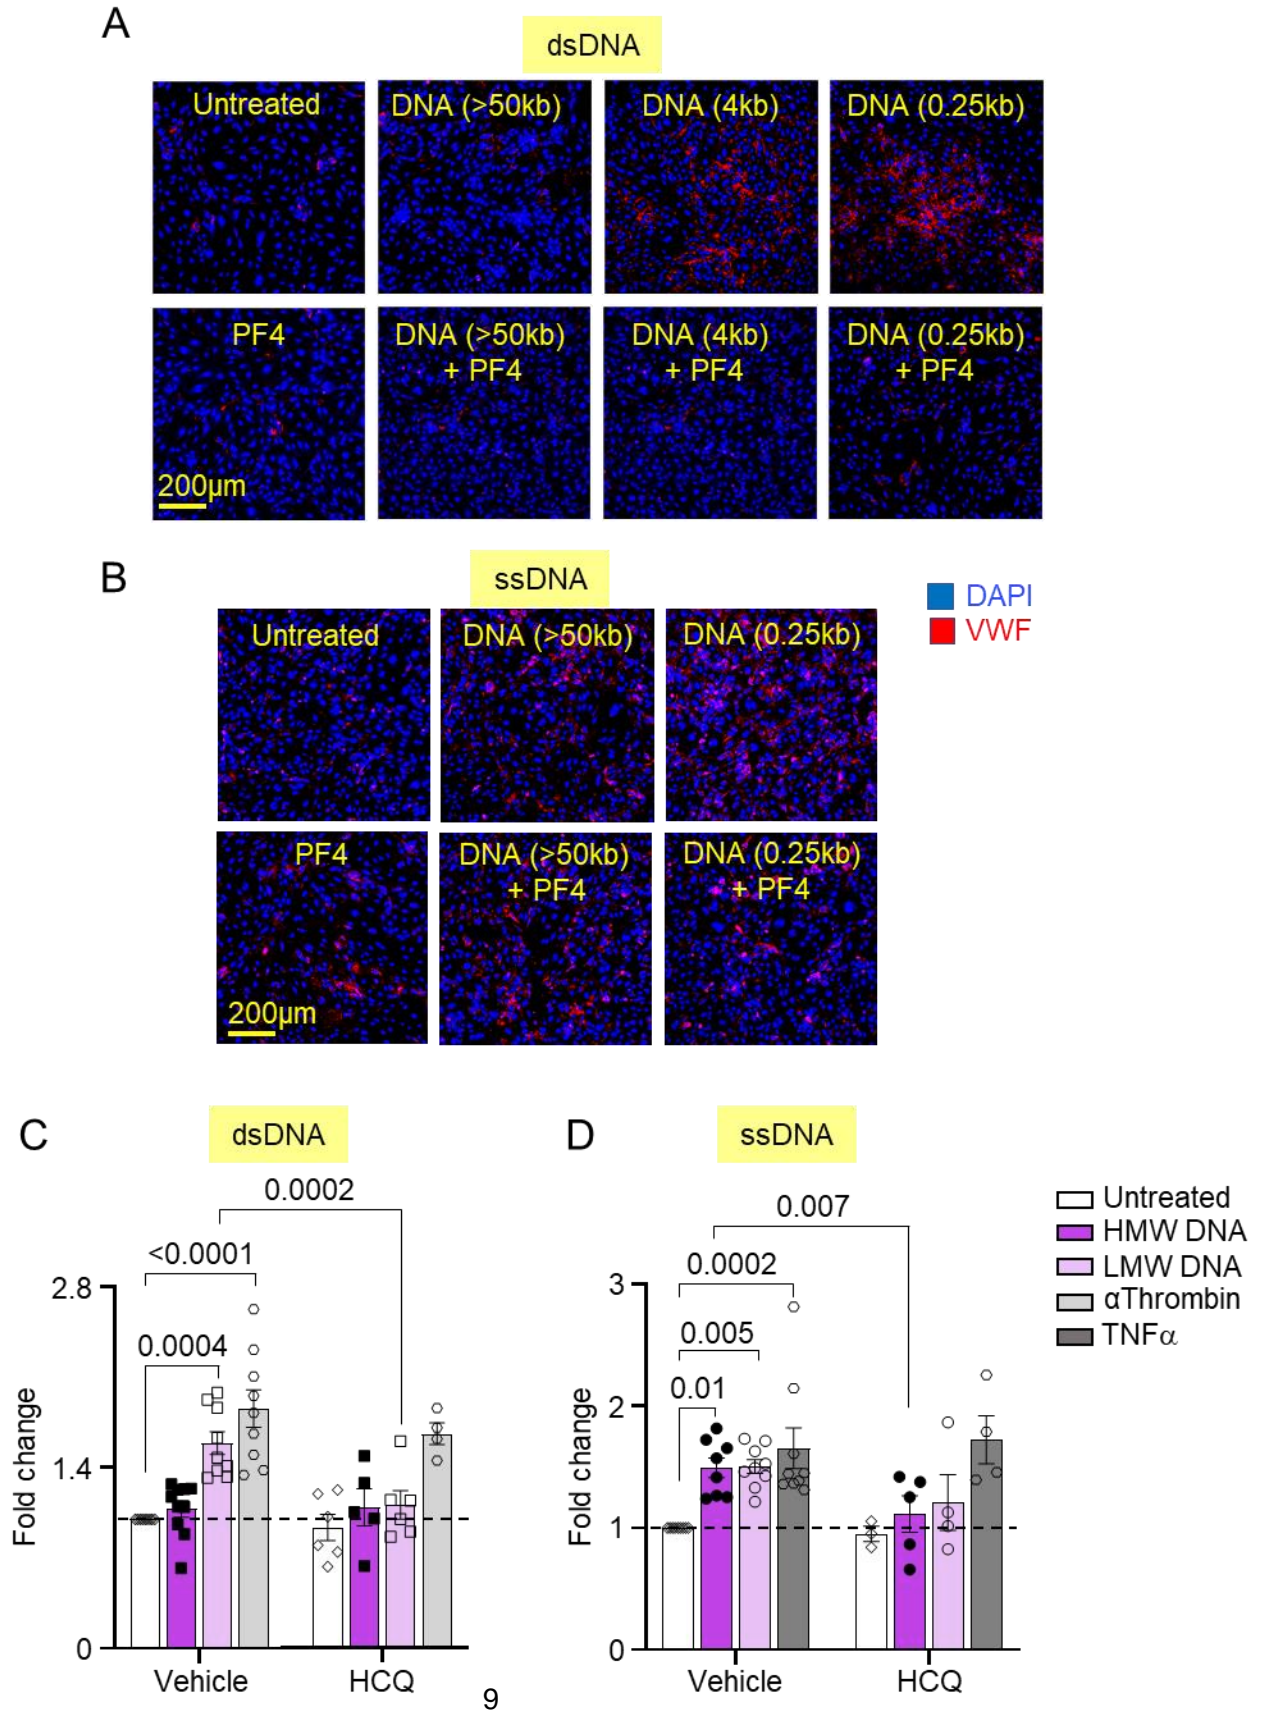

## REFERENCES

1. Cuker A, Rux AH, Hinds JL, et al. Novel diagnostic assays for heparin-induced thrombocytopenia. *Blood*. 2013;121(18):3727-3732.
2. Arepally GM, Kamei S, Park KS, et al. Characterization of a murine monoclonal antibody that mimics heparin-induced thrombocytopenia antibodies. *Blood*. 2000;95(5):1533-1540.
